# The inhibition of crystal growth of gypsum and barite scales in industrial water systems using green antiscalant

D. E. Abd-El-Khalek, B. A. Abd-El-Nabey, Mervat A. Abdel-kawi, Sh. Ebrahim and S. R. Ramadan

## ABSTRACT

Mineral scale is a major flow assurance problem in industrial water systems. The antiscaling properties of sunflower (*Helianthus annuus*) seed extract for  $\text{CaSO}_4$  and  $\text{BaSO}_4$  scales were investigated using NACE and conductivity tests, respectively. Comparative studies between the extract and 1-hydroxyethane-1,1-diphosphonic acid (HEDP), as commercial antiscalants, were done. The results revealed that the inhibition of  $\text{CaSO}_4$  scales using sunflower seed extract reached 100%, while HEDP achieved a maximum inhibition of 88%. Moreover, the maximum inhibition of  $\text{BaSO}_4$  scale in the presence of the extract was 84% compared with 86% in the presence of HEDP. Also microscopic examination showed that both inhibitors modified  $\text{CaSO}_4$  and  $\text{BaSO}_4$  crystals.

**Key words** | green antiscalant, gypsum and barite, HEDP, sunflower seeds

**D. E. Abd-El-Khalek** (corresponding author)  
Marine Chemistry Department,  
National Institute of Oceanography and Fisheries,  
Elanfoshy, Alexandria,  
Egypt  
E-mail: [dalia1282002@yahoo.com](mailto:dalia1282002@yahoo.com)

**B. A. Abd-El-Nabey**  
Faculty of Science, Chemistry Department,  
Alexandria University,  
Ibrahimia, P.O. Box 426, Alexandria 21321,  
Egypt

**Mervat A. Abdel-kawi**  
**S. R. Ramadan**  
Environment Department,  
Institute of Graduate Studies and Research,  
El-Horria Road, Alexandria 21526,  
Egypt

**Sh. Ebrahim**  
Materials Science Department,  
Institute of Graduate Studies & Research,  
Alexandria University,  
163 Horreya Avenue, El-Shatby, Alexandria 21526,  
Egypt

## INTRODUCTION

Industrial water systems operated on poorly treated feed water are often plagued by deposition of undesirable materials on equipment surfaces (Amjad *et al.* 2014). Water scaling on heat exchangers and petroleum production equipment surfaces is often the persistent problem in cooling water systems, boilers, secondary oil recovery, and desalination plants (Abdel-Gaber *et al.* 2008). However, although carbonates are common types of scales, sulfate scales are far more difficult to remove once they form on equipment surfaces (Amjad 1994).

To mitigate the problem of scaling, a number of chemical formulations have been used as inhibiting compounds which are able to suppress scale precipitation. The influence of polymeric additives containing the  $-\text{COOH}$  group on both the rate and crystal modification of gypsum has been the subject of numerous investigations (Öner *et al.* 1998; Dogan *et al.*

2000; Senthilmurugan *et al.* 2010; Amjad 2012). Results of these studies reveal that these polymers are effective gypsum scale inhibitors and the inhibition increases with the acid content of the polymer (Dogan *et al.* 2000).

In addition, phosphonate-containing molecules have been investigated for  $\text{BaSO}_4$  (Jones *et al.* 2003; Wang *et al.* 2005) and  $\text{CaSO}_4$  (Amjad *et al.* 2014; Dogan *et al.* 2016) inhibition. Also, various techniques are used to elucidate the mechanism of interaction between EDTA and barium sulfate surfaces (Jones *et al.* 2007). It is shown that complexation with metal ions is not sufficient to explain the inhibition of barite crystallization but that other processes such as chemisorption must also occur.

Because of the fact that scale deposits are crystalline with a surface charge which is either directly or indirectly pH dependent, the chemical additives depending on the

extent of ionization of their functional groups cause changes in the distribution of electrical charges on the surface of the suspended particles, thus determining the stability of the respective suspensions (Amjad *et al.* 2014). The use of chemical compounds in a variety of applications is conditioned by environmental and health concerns. Accordingly, during recent years, industrial requirements for chemical compounds refer not only to their efficacy but to safety as well. The requisites for these compounds should focus on non-mutagenic, non-carcinogenic products with characteristics more environmentally acceptable than systems currently in use. Thus, some green antiscalants have been tested and evaluated (Li *et al.* 2006; Martinod *et al.* 2009; Wang *et al.* 2013). Currently plant extracts are employed as scale inhibitors in order to develop new cleaning chemicals for a green environment (Abdel-Gaber *et al.* 2008, 2011, 2012; Castillo *et al.* 2009; Abd-El-Khalek *et al.* 2016). Plant extracts are viewed as a rich source of natural chemical compounds that can be extracted by simple procedures at low cost. It has been reported that extract of sunflower (*Helianthus annuus*) seeds is rich in lipids and amino acids which contain many functional groups and have surface active properties (Evon *et al.* 2007). Moreover, protein macromolecules are expected to enable more elaborate control of crystal morphology and structure (Qi *et al.* 2000).

This work aims to examine the efficiency of sunflower seed (*Helianthus annuus*) extract as a green inhibitor of calcium sulphate and barium sulfate scales for industrial water application. The antiscalant performance of the extract was compared with the performance of the commercially available antiscalant HEDP (hydroxyethylidene-1,1-diphosphonic acid).

## MATERIALS AND METHODS

### Preparation of solutions

Double distilled water and analytical reagent-grade NaCl, BaCl<sub>2</sub>, Na<sub>2</sub>SO<sub>4</sub> and CaCl<sub>2</sub> and HEDP were used for preparing solutions. Stock solution of sunflower seed (*Helianthus annuus*) extract was obtained by drying the leaves for 2 hours in an oven at 70 °C and grinding to powdery form. A 5 g sample of the powder was refluxed in 100 mL distilled

water for 1 hour. The refluxed solution was filtered to remove any contamination. The concentration of the stock solution was determined by evaporating 10 mL of the filtrate and weighing the residue. The concentration of the stock solution was expressed in terms of grams per litre.

### NACE test for calcium sulfate scaling

The test method is described in the NACE Standard (TM 0374-2001) 'Laboratory Screening Tests to Determine the Ability of Scale Inhibitors to Prevent the Precipitation of Calcium Sulfate' (Miksic *et al.* 2007). For the test, synthetic brines were prepared: calcium brine: 7.5 g/L NaCl + 11.0 g/L CaCl<sub>2</sub>·2H<sub>2</sub>O and sulfate brine: 7.5 g/L NaCl + 10.66 g/L Na<sub>2</sub>SO<sub>4</sub>.

Solutions for each test were connected in the test cell with different concentrations of sunflower seed extract or HEDP. Testing cells were placed in the water bath set at 71 °C for 72 hours. After that the concentration level of calcium ions was determined in the solution by titration with EDTA and murexide indicator.

Using these data, the percentage of scale inhibition was calculated:

$$\% \text{ Inhibition} = 100 \times (C_a - C_b) / (C_c - C_b)$$

where  $C_a = \text{Ca}^{2+}$  concentration in the treated sample after precipitation;  $C_b = \text{Ca}^{2+}$  concentration in the blank after precipitation;  $C_c = \text{Ca}^{2+}$  concentration in the blank before precipitation.

### Conductivity test for BaSO<sub>4</sub> scaling

This test is based upon the solution conductivity measurements while barium sulfate is being precipitated from barium chloride solution by the addition of sodium sulfate in the presence of different concentrations of the inhibitor. The supersaturation point,  $S$ , is a key point in homogeneous nucleation. When the ionic product is beyond this point, the homogeneous nucleation rate increases suddenly, and this results in precipitation and scaling (Drela *et al.* 1998; Abdel-Gaber *et al.* 2008). Supersaturation point  $S$  is represented by the maximum volume of sodium sulfate after which

precipitation occurs. The test setup has been described previously (Drela *et al.* 1998; Abdel-Gaber *et al.* 2008). A solution of 0.5 mL of 0.1 M BaCl<sub>2</sub> was added to the appropriate volume of the stock solution of sunflower seed extract or HEDP, and then the mixture was made up to 100 mL by distilled water. The conductivity of the stirred solution was measured during titration by 0.01M Na<sub>2</sub>SO<sub>4</sub> using an HQ14d conductivity meter. The titrating solution was added in portions of 0.2 mL each. Measurements were done at 25.0 ± 0.1 °C.

### FTIR spectrum

A Fourier transform infrared (FTIR) spectrometer (FTIR LX 18-5255 Perkin Elmer) was used for characterizing the sunflower extract. The spectra were recorded in the wavenumber range of 4,000–400 cm<sup>-1</sup>. The extract sample was ground with KBr and the powdered mixture was

pressed in a hydraulic press to form a translucent disk through which the beam of the spectrometer could pass.

### Microscopic examination

The morphology and crystal lattices of the scales were observed with an optical microscope (Axioskop 40 Zeiss), and a scanning electron microscope (SEM; JEOL-5300 scanning microscope). Prior to SEM examination, scale crystals were sputter-coated with a thin film of gold under vacuum.

## RESULTS AND DISCUSSION

### FTIR and functional groups

Figure 1 illustrates the FTIR spectrum of the sunflower seed extract. As is seen, a broad band at 3,374 cm<sup>-1</sup> was observed, and this band can be attributed to the stretching of the

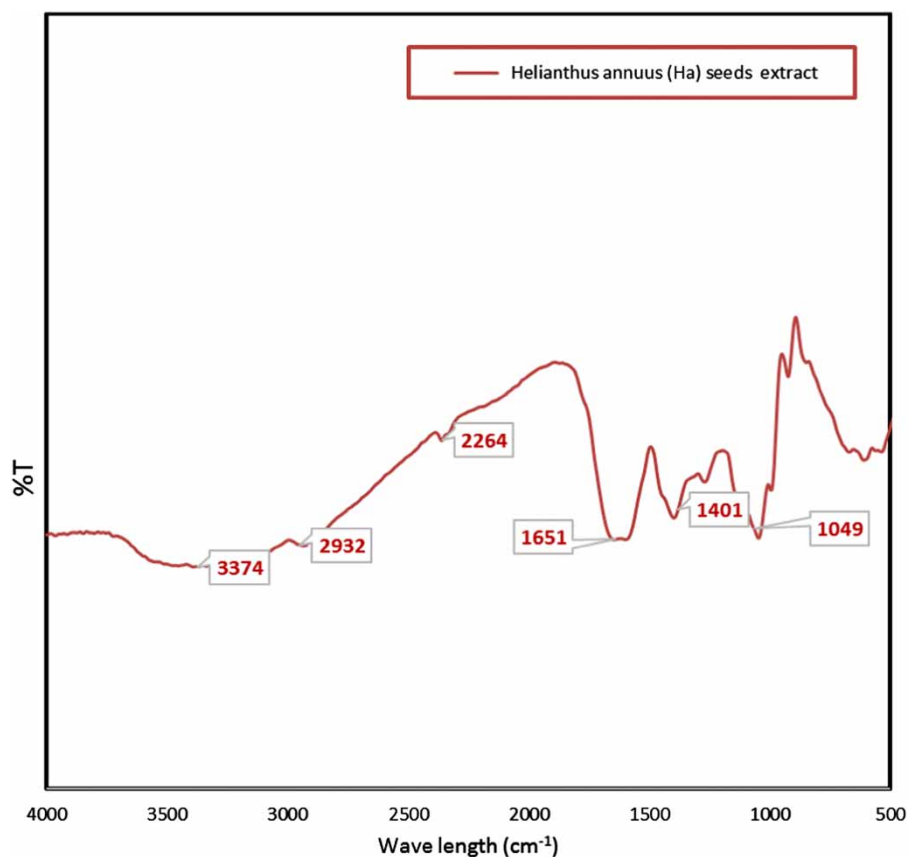

Figure 1 | FTIR spectrum of sunflower (*Helianthus annuus*) seed extract.

hydroxyl group, or N-H broad band. The appearance of the N-H band's vibration at  $3,300\text{--}3,500\text{ cm}^{-1}$  is an indication of the presence of amine groups (Etemadi *et al.* 2017) as a result of the presence of amino acids in the *Helianthus annuus* extract (Evon *et al.* 2007). The band at  $1,651\text{ cm}^{-1}$  is probably attributed to the C=O bond of the carboxylic group. In addition, the peak at  $2,932\text{ cm}^{-1}$  is assigned to C-H bending, while the peak at  $1,049\text{ cm}^{-1}$  can be attributed to the C-O ether band. Also, the peak at  $2,264\text{ cm}^{-1}$  is assigned to the C $\equiv$ N band. It is reported that the studied extract is rich with flavonoids, triterpenoids, oils and amino acids (Evon *et al.* 2007; Dwivedi & Sharma 2014) which act as sources of carboxyl and amine groups in addition to phenolic structures.

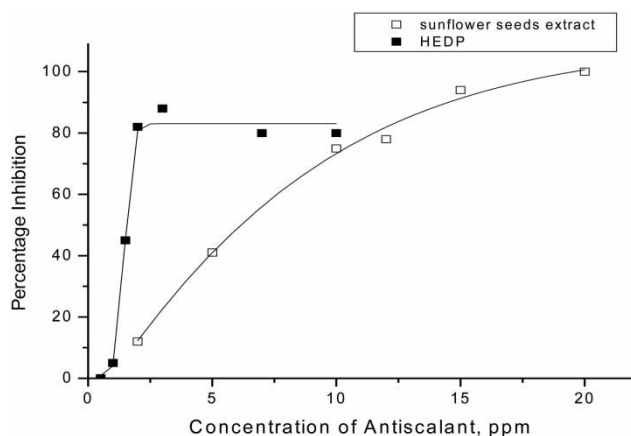

**Figure 2** | Variation of percentage inhibition of calcium sulfate scales with concentration of sunflower seed extract and HEDP.

### Calcium sulfate scaling

The NACE experiment was used to test the efficiency of sunflower seed extract as a  $\text{CaSO}_4$  scale inhibitor. Figure 2 shows the variation of percentage inhibition of calcium sulfate scale with concentration each of sunflower seeds and HEDP. As shown, increasing the concentration of plant extract increases the percentage of calcium sulfate scale inhibition. It is clear that in the presence of low concentrations of the inhibitors (less than 10 ppm), HEDP is more efficient, while at higher concentration, the efficiency of sunflower seed extract exceeds HEDP and reaches 100% at 20 ppm of the extract.

Figure 3 shows photographs of  $\text{CaSO}_4$  crystals after precipitation in the absence and presence of the optimum concentrations of sunflower seed extract and HEDP. As is seen, in the absence of antiscalant, gypsum crystals are thin tubular cells and needles exhibiting monoclinic symmetry (Issabayev *et al.* 2018), whereas crystals grown in the presence of additives are markedly modified with a lack of tubular-cell-shaped gypsum and of reduced size. The morphology changes indicate that scale inhibitors significantly damage the crystalline structure of calcium sulfate, which may result from coordination between functional groups and  $\text{Ca}^{2+}$  ions. Amino acids which are extracted from sunflower seeds (Evon *et al.* 2007; Zhang *et al.* 2017), in addition to phosphonate groups in HEDP, might exert strong interaction with  $\text{Ca}^{2+}$  ions (Hoang 2015).

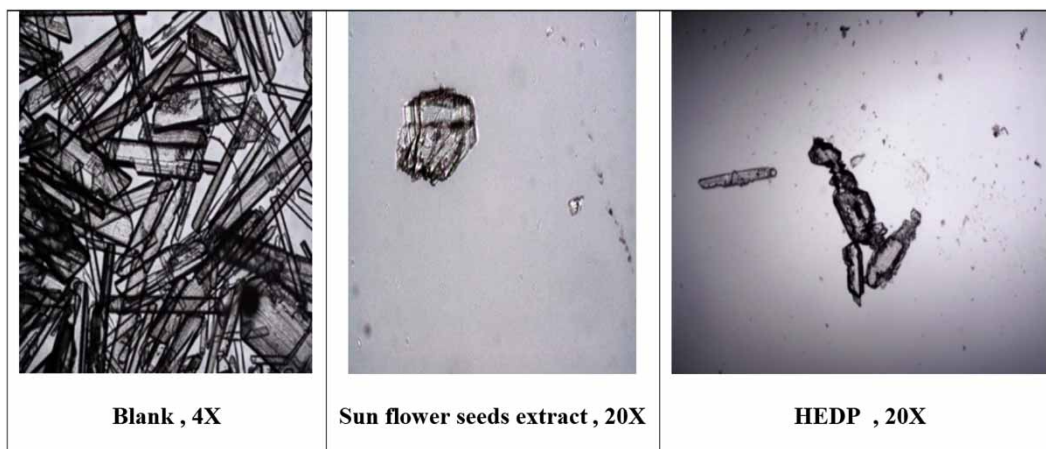

**Figure 3** | Photographs of  $\text{CaSO}_4$  crystals after precipitation in the absence and presence of scale inhibitors at their optimum concentrations.

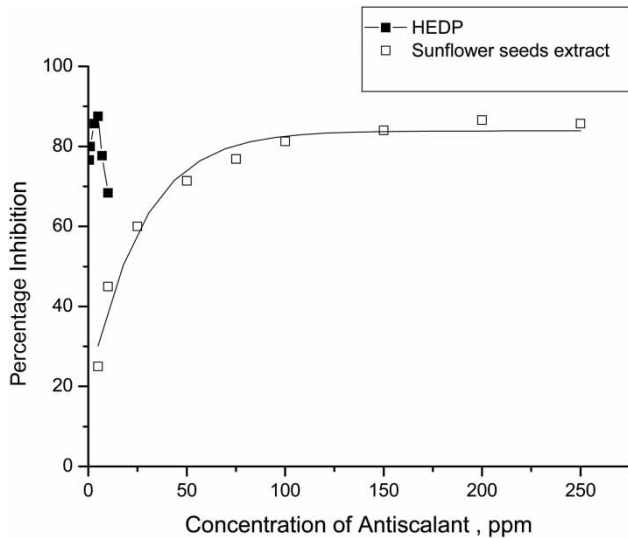

**Figure 4** | Variation of percentage inhibition of barium sulfate scales with concentration of sunflower seed extract and HEDP.

### Barium sulfate scales

Figure 4 shows the variation of percentage inhibition of barium sulfate scales with concentration of sunflower seed extract and HEDP. Percentage of scale inhibition was calculated from the following equation:

$$\% \text{ scale inhibition} = (S_{in} - S_o) / S_{in}$$

where  $S_o$  = supersaturation point in the absence of scale inhibitor and  $S_{in}$  = supersaturation point in presence of scale inhibitor.

As is seen, the percentage inhibition of  $BaSO_4$  scales increases linearly with extract concentration. A plateau region is observed at 100 ppm of the extract with 83% inhibition; after this concentration, no notable increase of the inhibition is observed. Moreover, maximum inhibition in the presence of HEDP is 86% at 5 ppm, and further increase of the concentration decreases its efficiency. It is clear that HEDP acts as a threshold inhibitor, while the influence of the extract may be attributed to change of the ionic strength and/or it may form a stable complex with cations and/or anions and reduce supersaturation (Amjad 1994). However, the tested extracts have high optimal concentrations; they could be promising green antiscalants with regard to eutrophication caused by phosphorus polymers.

Figure 5 shows photographs of  $BaSO_4$  crystals after precipitation in the absence and presence of sunflower seed extract and HEDP. As is seen, pillow-shaped barium sulfate scales were observed in the absence of the examined antiscalants (Jones *et al.* 2007). These crystals were modified by the addition of the extract and HEDP with reduction of their size. The observed change in morphology may be explained in terms of the surface adsorption of scale inhibitors on the growing  $BaSO_4$  crystals (Amjad 1994). The adsorption could take place via (i) electrostatic attraction between the charged particles and the charged chemical constituents of the extract, (ii) dipole-type interaction between unshared electron pairs in the extracted molecules and growing particles, (iii)  $\pi$ -interaction with particle surfaces and (iv) a combination of all of the above (Schweinsberg *et al.* 1988; Abdel-Gaber *et al.* 2008). A combination of all of the above cases of adsorption can arise because of the chemical constituents of sunflower seed extract, which contains many functional groups. Therefore, the inhibition properties of the extract largely depend on the carboxylic acid groups, which have a noticeable inhibition effect on barite crystallization through strong interaction with the growing  $BaSO_4$  particles (Qi *et al.* 2000).

### CONCLUSION

An approach to fighting sulfate scales has been provided by using sunflower seed extract as a novel green antiscalant. The results revealed that the extract inhibits the precipitation of both barium and calcium sulfate. In comparison with HEDP, the extract has a value of percentage inhibition of barium sulfate near to that of HEDP with a notable difference in their optimum concentrations. However, sunflower seed extract is a more efficient inhibitor than HEDP for calcium sulfate scale precipitation. Also microscopic examination showed that both inhibitors modified  $CaSO_4$  and  $BaSO_4$  crystals. Carboxyl and amine groups in addition to phenolic structures that are extracted from sunflower seeds may have important roles in sulfate crystal growth suppression.

However, the tested extract has higher optimal concentration; it can be considered as an alternative to non-green

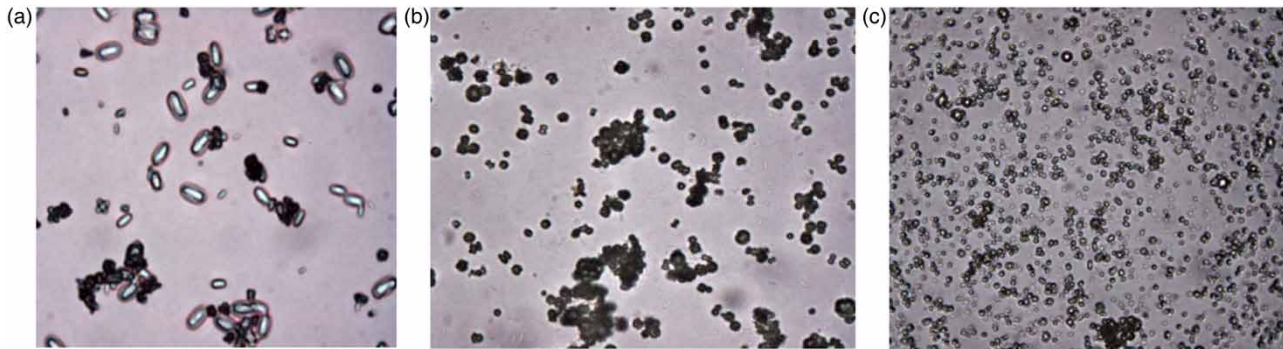

Optical micrographs (40X)

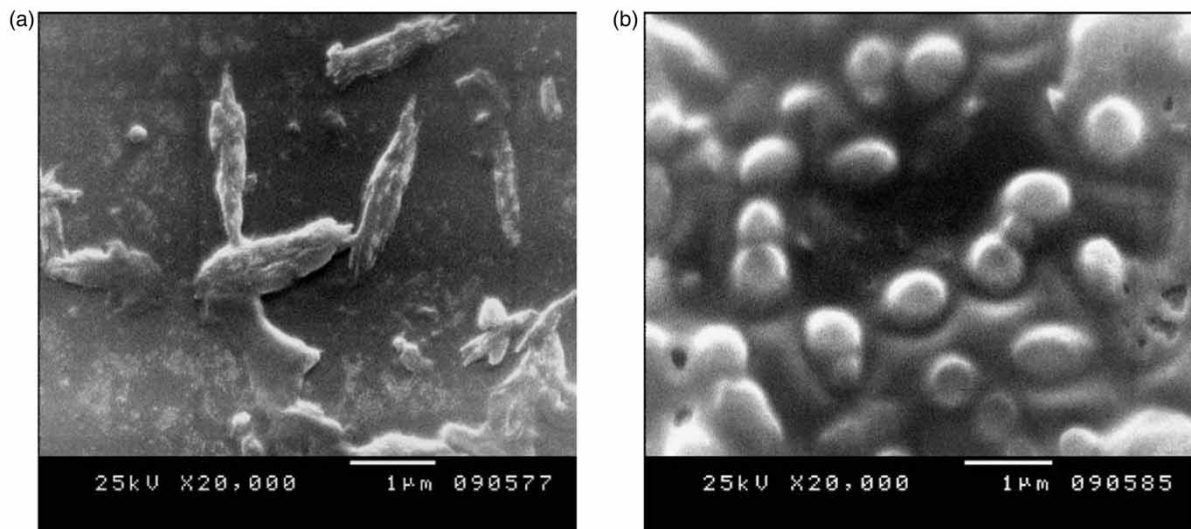

SEM micrographs

**Figure 5** |  $\text{BaSO}_4$  crystals after precipitation in the absence and presence of scale inhibitors at their optimum concentration: (a) blank, (b) in the presence of sunflower seed extract and (c) in the presence of HEDP.

technologies especially in food and pharmaceutical industries and desalination plants, with regard to eutrophication caused by phosphorus polymers.

## REFERENCES

- Abdel-Gaber, A. M., Abd-El-Nabey, B. A., Khamis, E. & Abd-El-Khalek, D. E. 2008 Investigation of fig leaf extract as a novel environmentally friendly antiscalant for  $\text{CaCO}_3$  calcareous deposits. *Desalination* **230**, 314–328.
- Abdel-Gaber, A. M., Abd-El-Nabey, B. A., Khamis, E. & Abd-El-Khalek, D. E. 2011 A natural extract as scale and corrosion inhibitor for steel surface in brine solution. *Desalination* **278**, 337–342.
- Abdel-Gaber, A. M., Abd-El-Nabey, B. A., Khamis, E., Abd-El-Rhmann, H., Aglan, H. & Ludwick, A. 2012 Green anti-scalant for cooling water systems. *International Journal of Electrochemical Science* **7**, 11930–11940.
- Abd-El-Khalek, D. E., Abd-El-Nabey, B. A., Abdel-kawi, M. A. & Ramadan, S. R. 2016 Investigation of a novel environmentally friendly inhibitor for calcium carbonate scaling in cooling water. *Desalination and Water Treatment* **57**, 2870–2876.
- Amjad, Z. 1994 Inhibition of barium sulfate precipitation: effects of additives, solution pH, and supersaturation. *Water Treatment* **9**, 47–56.
- Amjad, Z. 2012 Investigations on the evaluation of polymeric calcium sulfate dihydrate (gypsum) scale inhibitors in the presence of phosphonates. *Desalination and Water Treatment* **37**, 268–276.
- Amjad, Z., Landgraf, R. T. & Penn, J. L. 2014 Calcium sulfate dihydrate (gypsum) scale inhibition by PAA, PAPEMP, and

- PAA/PAPEMP blend. *International Journal of Corrosion and Scale Inhibition* **3**, 35–47.
- Castillo, L. A., Torin, E. V., Garcia, J. A., Carrasquero, M. A., Navas, M. & Vilorio, A. 2009 [New product for inhibition of calcium carbonate scale in natural gas and oil facilities based on aloe vera: application in Venezuelan oilfields](#). In: *Latin American and Caribbean Petroleum Engineering Conference*, 31 May–3 June, Cartagena de Indias, Colombia, SPE 123007, Society of Petroleum Engineers.
- Dogan, O., Akyol, E., Baris, S. & Oner, M. 2000 Control of crystallization processes by diblock copolymers. In: *Advances in Crystal Growth Inhibition Technologies* (Z. Amjad, ed.). Kluwer Academic/Plenum Publishers, New York, USA, pp. 197–206.
- Dogan, Ö., Erdemir, C. S., Akyol, E., Kirboga, S. & Öner, M. 2016 [Effect of conductive copolymers on scale formation of gypsum](#). *Pure and Applied Chemistry* **89** (1), 153–159.
- Drela, I., Falewicz, P. & Kuczkowska, S. 1998 [New rapid test for evaluation of scale inhibitors](#). *Water Research* **32**, 3188–3191.
- Dwivedi, A. & Sharma, G. N. 2014 A review on heliotropism plant: *Helianthus annuus* L. *The Journal of Phytopharmacology* **3**, 149–155.
- Etemadi, H., Yegani, R. & Seyfollahi, M. 2017 [The effect of amino functionalized and polyethylene glycol grafted nanodiamond on anti-biofouling properties of cellulose acetate membrane in membrane bioreactor systems](#). *Separation and Purification Technology* **177**, 350–362.
- Evon, P., Vandenbossche, V., Pontalier, P.-Y. & Rigal, L. 2007 Aqueous extraction of oil from sunflower seeds in batch reactor: reorganization of the mixing in three formulated fractions. In: *98th AOCs Annual Meeting & Expo*, 13–16 May, Québec City, QC, Canada.
- Hoang, T. A. 2015 Mechanisms of scale formation and inhibition. In: *Mineral Scales and Deposits* (Z. Amjad & K. D. Demadis, eds). Elsevier, Amsterdam, The Netherlands, pp. 47–83.
- Issabayev, Y. A., Boiko, G. I., Lyubchenko, N. P., Shaikhutdinov, Y. M., Muhr, H., Colombeau, L., Arnoux, P. & Frochot, C. 2018 [Synthesis of unexplored aminophosphonic acid and evaluation as scale inhibitor for industrial water applications](#). *Journal of Water Process Engineering* **22**, 192–202.
- Jones, F., Stanley, A., Oliveira, A., Rohl, A. L., Reyhani, M. M., Parkinson, G. M. & Ogden, M. I. 2003 [The role of phosphonate speciation on the inhibition of barium sulfate precipitation](#). *Journal of Crystal Growth* **249**, 584–593.
- Jones, F., Jones, P., Ogden, M. I., Richmond, W. R., Rohl, A. L. & Saunders, M. 2007 [The interaction of EDTA with barium sulfate](#). *Journal of Colloid and Interface Science* **316**, 553–561.
- Li, H. Y., Ma, W., Wang, L., Liu, R., Wei, L. S. & Wang, Q. 2006 [Inhibition of calcium and magnesium-containing scale by a new antiscalant polymer in laboratory tests and a field trial](#). *Desalination* **196**, 237–247.
- Martinod, A., Neville, A., Euvrad, M. & Sorbie, K. 2009 [Electrodeposition of a calcareous layer: effects of green inhibitors](#). *Chemical Engineering Science* **64**, 2413–2421.
- Miksic, B. A., Furman, A. Y. & Kharshan, M. A. 2007 *New Generation of Water-Treatment Products Formulated from Biodegradable and Renewable Raw Materials*. Paper 07064, NACE International.
- NACE Standard TM 0374-2001 2001 Item 21208.
- Öner, M., Doğan, O. & Öner, G. 1998 [The influence of polyelectrolytes architecture on calcium sulfate dihydrate growth retardation](#). *Journal of Crystal Growth* **186**, 427–437.
- Qi, L., Cölfen, H. & Antonietti, M. 2000 [Control of barite morphology by double-hydrophilic block copolymers](#). *Chemistry of Materials* **12**, 2392–2403.
- Schweinsberg, D. P., George, G. A., Nanayakkawa, A. K. & Steinert, D. A. 1988 [The protective action of epoxy resins and curing agents – inhibitive effects on the aqueous acid corrosion of iron and steel](#). *Corrosion Science* **28**, 33–42.
- Senthilmurugan, B., Ghosh, B., Kundu, S. S., Haroun, M. & Kameshwari, B. 2010 [Maleic acid based scale inhibitors for calcium sulfate scale inhibition in high temperature application](#). *Journal of Petroleum Science Engineering* **75**, 189–195.
- Wang, F., Xu, G., Zhang, Z., Song, S. & Dong, S. 2005 [A systematic morphosynthesis of barium sulfate in the presence of phosphonate inhibitor](#). *Journal of Colloid and Interface Science* **293**, 394–400.
- Wang, H., Liu, G., Huang, J., Zhou, Y., Yao, Q., Ma, S., Cao, K., Liu, Y., Wu, W., Sun, W. & Hu, Z. 2013 [Performance of an environmentally friendly anti-scalant in CaSO<sub>4</sub> scale inhibition](#). *Desalination and Water Treatment* **53**, 8–14.
- Zhang, S., Qu, H., Yang, Z., Fu, C., Tian, Z. & Yang, W. 2017 [Scale inhibition performance and mechanism of sulfamic/amino acids modified polyaspartic acid against calcium sulfate](#). *Desalination* **419**, 152–159.

First received 12 September 2018; accepted in revised form 20 June 2019. Available online 1 July 2019
